# Supplementary material
Source: Research Square preprint supplement (doi:10.21203/rs.3.rs-9630342/v1)
Supplement: Supplementary file 1 [file ee8d002d82e1a6ee9fe2632d.xlsx]

## Sheet: Information
	Article Title: Co-inoculation of Cyanobacteria and Fungi Promotes Biocrust Formation and Stabilization of Quartz Sand Mine Tailings
	Journal name: Microbial Ecology
	Authors: Ivan Dudaš a,b,*, Tamara Dulić b, Eleonora Čapelja a, Miriam Nystrand c, Tamara Palanački Malešević a, Peter Österholm c, Zorica Svirčev a,b, Jussi Meriluoto a,b
	Affiliations: a University of Novi Sad, Faculty of Sciences, Department of Biology and Ecology, Trg Dositeja Obradovića 2, 21000 Novi Sad, Serbia. b Åbo Akademi University, Faculty of Science and Engineering, Biochemistry and Cell Biology, Tykistökatu 6A, 20520 Turku, Finland c Åbo Akademi University, Faculty of Science and Engineering, Geology and Mineralogy, Akatemiankatu 1, 20500 Turku, Finl…
	Corresponding Author email adress: ivan.dudas@abo.fi

## Sheet: Table S1
Table S1. List of CF sample codes and their corresponding strains.
Co-inoculation	Cyanobacteria	Fungi
C1F1	Nostoc sp.	Penicillium oxalicum
C1F2	Nostoc sp.	Purpureocillium lilacinum
C1F3	Nostoc sp.	Aspergillus clavatus
C1F4	Nostoc sp.	Penicillium brasilianum
C1F5	Nostoc sp.	Penicillium concavorugulosum
C2F1	Trichormus sp.	Penicillium oxalicum
C2F2	Trichormus sp.	Purpureocillium lilacinum
C2F3	Trichormus sp.	Aspergillus clavatus
C2F4	Trichormus sp.	Penicillium brasilianum
C2F5	Trichormus sp.	Penicillium concavorugulosum
C3F1	Chroococcidiopsis sp. (1)	Penicillium oxalicum
C3F2	Chroococcidiopsis sp. (1)	Purpureocillium lilacinum
C3F3	Chroococcidiopsis sp. (1)	Aspergillus clavatus
C3F4	Chroococcidiopsis sp. (1)	Penicillium brasilianum
C3F5	Chroococcidiopsis sp. (1)	Penicillium concavorugulosum
C4F1	Tolypothrix sp.	Penicillium oxalicum
C4F2	Tolypothrix sp.	Purpureocillium lilacinum
C4F3	Tolypothrix sp.	Aspergillus clavatus
C4F4	Tolypothrix sp.	Penicillium brasilianum
C4F5	Tolypothrix sp.	Penicillium concavorugulosum
C5F1	Chroococcidiopsis sp. (2)	Penicillium oxalicum
C5F2	Chroococcidiopsis sp. (2)	Purpureocillium lilacinum
C5F3	Chroococcidiopsis sp. (2)	Aspergillus clavatus
C5F4	Chroococcidiopsis sp. (2)	Penicillium brasilianum
C5F5	Chroococcidiopsis sp. (2)	Penicillium concavorugulosum

## Sheet: Table S2
Table S2. Geochemical characteristics of the sediment (mean ± SD).
	Parameter	Value
	pH	7±0.28
	pHFOX	4.25±0.07
	Conductivity	9.59±1.77
	ConductivityFOX	4.35±0.21
	TPAFOXpH5,5 (mmol kg-1)	0.92±1.3
	TPAFOXpH6,5 (mmol kg-1)	5.93±1.98
	Al (mg kg -1)	0.27±0.24
	AlFOX (mg kg -1)	35.03±0.79
	Ba (mg kg -1)	0.04±0.01
	BaFOX (mg kg -1)	0.52±0
	Ca (mg kg -1)	44.8±15.94
	CaFOX (mg kg -1)	89.85±0.62
	Cd (mg kg -1)	UD
	CdFOX (mg kg -1)	UD
	Co (mg kg -1)	UD
	CoFOX (mg kg -1)	0.41±0.06
	Cr (mg kg -1)	UD
	CrFOX (mg kg -1)	UD
	Cu (mg kg -1)	UD
	CuFOX (mg kg -1)	UD
	Fe (mg kg -1)	0.59±0.72
	FeFOX (mg kg -1)	110.14±2.36
	K (mg kg -1)	7.7±0.46
	KFOX (mg kg -1)	23.95±0.46
	Mg (mg kg -1)	10.53±2.72
	MgFOX (mg kg -1)	26.01±0.35
	Mn (mg kg -1)	0.01±0.01
	MnFOX (mg kg -1)	29.9±0.81
	Na (mg kg -1)	4.32±0.72
	NaFOX (mg kg -1)	16.54±0.19
	Ni (mg kg -1)	UD
	NiFOX (mg kg -1)	1.72±0.01
	P (mg kg -1)	0±0
	PFOX (mg kg -1)	167.66±1.26
	Pb (mg kg -1)	UD
	PbFOX (mg kg -1)	UD
	S (mg kg -1)	24.26±1.02
	SFOX (mg kg -1)	26.68±1.86
	S (%)	0.0024±0.0001
	SFOX (%)	0.0027±0.0002
	Sr (mg kg -1)	0.15±0.05
	SrFOX (mg kg -1)	0.37±0
	Zn (mg kg -1)	UD
	ZnFOX (mg kg -1)	UD
UD - Under the detection limit of the ICP-OES; FOX - H2O2 extraction

## Sheet: Table S3
Table S3. Reasearch data
Sample	Treatment	Replicate	Chlorophyll-a (µg/g)	Fungal Abundance (CFU/g)	LB-EPS (mg/g)	TB-EPS (mg/g)	Total EPS (mg/g)	WDPT (s)	Biocrust Thickness (mm)	Mechanical resistance (kg/cm2)
Control	Control	1	0.42	320000	0	0	0	0.5	2.33333	0
Control	Control	2	2.38	115000	0	6.03226	6.03226	0.5	2.33333	0
Control	Control	3	0.6	300000	0	0	0	0.5	2.16667	0
F1	F	1	NA	1055000	NA	NA	NA	0.5	2.66667	0
F1	F	2	NA	490000	NA	NA	NA	0.5	3.83333	0
F1	F	3	NA	575000	NA	NA	NA	0.5	2.91667	0
F2	F	1	NA	1845000	NA	NA	NA	0.5	3.66667	0
F2	F	2	NA	1500000	NA	NA	NA	0.5	3.41667	0
F2	F	3	NA	1650000	NA	NA	NA	0.5	3.5	0
F3	F	1	NA	1020000	NA	NA	NA	0.75	2.91667	0
F3	F	2	NA	990000	NA	NA	NA	0.5	2.08333	0
F3	F	3	NA	1070000	NA	NA	NA	0.5	2.41667	0
F4	F	1	NA	9700000	NA	NA	NA	0.5	2.58333	0
F4	F	2	NA	7300000	NA	NA	NA	0.5	3	0
F4	F	3	NA	7300000	NA	NA	NA	0.5	3.41667	0
F5	F	1	NA	130000	NA	NA	NA	0.5	2.66667	0
F5	F	2	NA	260000	NA	NA	NA	0.5	3.16667	0
F5	F	3	NA	370000	NA	NA	NA	0.55	3.83333	0
C1	C	1	34.04	NA	8.92684	4.93343	13.8603	11	1.16667	0.25
C1	C	2	30.53	NA	0	2.24848	2.24848	36.1	3.58333	0
C1	C	3	51.9	NA	5.25951	12.8259	18.0854	32	1.25	0.25
C2	C	1	19.46	NA	2.58335	5.27264	7.85598	200.2	1	0
C2	C	2	21.78	NA	2.10979	4.19292	6.30271	385.8	1	0
C2	C	3	19.52	NA	0.336695	2.91255	3.24924	103.7	1.16667	0
C3	C	1	3.69	NA	0	5.35863	5.35863	0.6	4.33333	0
C3	C	2	2.56	NA	0	15.7354	15.7354	2.1	1.41667	0
C3	C	3	17.2	NA	0	6.69155	6.69155	1.95	5.16667	0
C4	C	1	128.74	NA	4.11966	4.44135	8.56101	40.3	3.16667	0
C4	C	2	134.57	NA	3.134	3.82983	6.96383	19.8	2.83333	0
C4	C	3	73.86	NA	0	0	0	21.4	4.5	0
C5	C	1	7.74	NA	4.05358	6.69155	10.7451	8.2	3.08333	0
C5	C	2	9.7	NA	0	3.82983	3.82983	4	2.66667	0
C5	C	3	10.24	NA	1.8675	3.47152	5.33902	4.1	3.83333	0
C1F1	CF	1	20.41	965000	0.358721	2.1386	2.49732	1.3	1.08333	0
C1F1	CF	2	40.41	1000000	3.67363	4.89999	8.57362	5.8	2.33333	0.25
C1F1	CF	3	54.76	1075000	4.35644	8.57867	12.9351	14.9	1.5	0.25
C1F2	CF	1	57.02	36800000	2.73202	11.6554	14.3874	42	1.41667	0.25
C1F2	CF	2	66.9	NA	3.79478	11.7414	15.5361	20.3	1.16667	0
C1F2	CF	3	46.6	NA	6.93899	7.52284	14.4618	50.5	1.16667	0
C1F3	CF	1	68.45	1525000	0	7.95281	7.95281	132.4	2.58333	0
C1F3	CF	2	43.51	1855000	6.526	10.0406	16.5666	182.2	1.25	0
C1F3	CF	3	83.32	3655000	5.66148	11.9468	17.6083	106.8	1.16667	0
C1F4	CF	1	41.42	5800000	6.92798	12.3147	19.2426	12.6	1.25	0
C1F4	CF	2	31.25	6800000	1.01399	4.93343	5.94743	0.95	4.66667	0
C1F4	CF	3	43.69	6300000	3.17805	7.85248	11.0305	5.55	1.08333	0
C1F5	CF	1	52.08	1290000	2.49524	5.2153	7.71055	0.5	0.833333	0
C1F5	CF	2	73.74	1480000	4.28486	10.6425	14.9274	19.5	1.16667	0
C1F5	CF	3	83.56	1110000	0	7.04986	7.04986	3.5	1.16667	0
C2F1	CF	1	12.26	380000	0	2.16726	2.16726	144.6	1.41667	0.25
C2F1	CF	2	15.59	410000	1.64174	2.63068	4.27241	102.8	1.25	0
C2F1	CF	3	16.72	330000	2.50075	3.04632	5.54707	212.5	2.33333	0
C2F2	CF	1	16.78	1635000	2.13181	3.58618	5.71799	168	1.75	0.5
C2F2	CF	2	21.19	1415000	2.09877	11.2015	13.3003	210.3	1.5	0.5
C2F2	CF	3	22.5	1460000	2.55031	5.05765	7.60796	351.4	1.5	0
C2F3	CF	1	20.06	1545000	3.07893	4.5799	7.65883	294.7	1.41667	0
C2F3	CF	2	14.11	1190000	0	0	0	371.9	1.16667	0.25
C2F3	CF	3	20.95	1275000	0	0	0	328.2	1.16667	0.25
C2F4	CF	1	20	6800000	0	0	0	372.7	0.833333	0
C2F4	CF	2	15.53	5800000	0	1.65037	1.65037	203	1.16667	0.25
C2F4	CF	3	14.28	5400000	1.66252	1.23492	2.89744	43.2	1.25	0.25
C2F5	CF	1	23.69	55000	1.90763	1.94599	3.85361	26.1	1.16667	0
C2F5	CF	2	14.88	150000	3.89838	1.71429	5.61267	398.1	1.33333	0.25
C2F5	CF	3	12.86	70000	1.74024	3.56785	5.30809	12.8	1.25	0.25
C3F1	CF	1	12.26	50000	0	4.79424	4.79424	1.05	1.16667	0
C3F1	CF	2	9.52	115000	0	2.25358	2.25358	6.3	2.5	0.25
C3F1	CF	3	9.46	100000	0	3.60381	3.60381	3.9	4.25	0
C3F2	CF	1	30.41	605000	1.44132	8.01002	9.45134	3.3	2.33333	0.25
C3F2	CF	2	27.56	720000	0.442956	3.96733	4.41028	0.7	3.08333	0
C3F2	CF	3	7.56	525000	0.144043	5.11782	5.26186	3.5	2.83333	0
C3F3	CF	1	18.81	60000	2.97773	6.29227	9.27001	2.9	5.41667	0
C3F3	CF	2	13.63	20000	3.58752	6.96339	10.5509	3.5	2.75	0
C3F3	CF	3	10.3	15000	0	1.99792	1.99792	1.2	5	0
C3F4	CF	1	11.55	5200000	0	1.27087	1.27087	2.5	5.08333	0
C3F4	CF	2	17.08	4800000	0	3.57584	3.57584	2.8	5.91667	0
C3F4	CF	3	14.7	4000000	0	5.57322	5.57322	0.95	3.58333	0
C3F5	CF	1	14.82	7465000	0.765781	5.70105	6.46683	1.6	2.16667	0
C3F5	CF	2	13.93	5255000	0	4.77826	4.77826	3.1	6.5	0
C3F5	CF	3	10.71	6715000	0	4.3668	4.3668	0.55	4.66667	0
C4F1	CF	1	109.1	535000	5.0223	4.16707	9.18936	77.6	1.5	0.25
C4F1	CF	2	130.28	575000	2.75056	1.59045	4.34101	294.1	2.58333	0.25
C4F1	CF	3	135.76	630000	2.37393	0.308138	2.68207	231.4	2.75	0
C4F2	CF	1	140.52	320000	4.62175	2.85279	7.47455	75.9	2.16667	0.25
C4F2	CF	2	82.02	365000	3.66523	1.03518	4.70041	155.9	2.58333	0.25
C4F2	CF	3	134.75	330000	6.63642	4.52659	11.163	341.4	2.25	0
C4F3	CF	1	132.37	190000	4.75327	2.09779	6.85106	56.2	1.91667	0
C4F3	CF	2	154.27	30000	3.63534	3.34814	6.98348	159.1	1.66667	0
C4F3	CF	3	122.07	145000	4.94458	3.45201	8.39658	133.7	3.5	0
C4F4	CF	1	122.13	1835000	1.34567	0	1.34567	61.4	1.16667	0.5
C4F4	CF	2	87.01	1210000	1.47121	0	1.47121	24	1.41667	0.25
C4F4	CF	3	91.48	1305000	0.765781	0.296153	1.06193	35.9	2.83333	0
C4F5	CF	1	81.96	30000	1.67448	0	1.67448	42.4	1.33333	0.25
C4F5	CF	2	130.4	15000	3.64132	1.68233	5.32365	40.9	1.16667	0
C4F5	CF	3	107.91	100000	3.80871	2.82084	6.62955	117.6	1.25	0
C5F1	CF	1	9.23	110000	1.62665	2.86877	4.49542	6.1	4	0.25
C5F1	CF	2	15.65	95000	2.71469	4.28691	7.0016	3.8	5.83333	0
C5F1	CF	3	8.57	210000	0	0	0	5.6	2.66667	0
C5F2	CF	1	11.55	1645000	1.90984	1.90325	3.81309	6	3.25	0
C5F2	CF	2	8.39	1440000	0	0	0	6.3	4.25	0.25
C5F2	CF	3	18.57	1045000	6.18907	4.05354	10.2426	8.5	2.5	0
C5F3	CF	1	7.02	965000	5.13922	1.37963	6.51885	5	3.33333	0
C5F3	CF	2	7.86	1130000	2.67114	5.75318	8.42431	4.8	3.83333	0
C5F3	CF	3	6.31	1180000	1.53533	3.01917	4.5545	5.7	3.91667	0.25
C5F4	CF	1	7.62	2800000	3.74555	3.74452	7.49007	5	4.91667	0
C5F4	CF	2	14.7	3600000	0.31971	1.52985	1.84956	5	4.08333	0
C5F4	CF	3	12.74	2100000	1.4371	0	1.4371	4.8	4.25	0
C5F5	CF	1	8.45	55000	0	1.83458	1.83458	4.7	4.66667	0
C5F5	CF	2	15.53	0	4.00341	2.07064	6.07405	4.7	4.66667	0
C5F5	CF	3	14.28	0	4.07708	3.55996	7.63705	3.6	4.08333	0
